# Supplementary material for: Chitosan-Urea Nanocomposite for Improved Fertilizer Applications: The Effect on the Soil Enzymatic Activities and Microflora Dynamics in N Cycle of Potatoes (Solanum tuberosum L.)
Source: MDPI journal article supplement (doi:10.3390/polym13172887), 2021-08-27
Supplement: s1 [file s1]

**Supplementary Table 1.** Effect of application of different concentrations of nano-chitosan-urea composite and conventional urea fertilizer on the soil chemical properties

| N-level | DAS | pH   |      |      | EC (dS m <sup>-1</sup> ) |      |      | OC (%) |      |      |
|---------|-----|------|------|------|--------------------------|------|------|--------|------|------|
|         |     | CU   | NCUC | CS   | NCUC                     | CS   | CS   | CU     | NCUC | CS   |
| 0       | 0   | 7.03 | 7.04 | 7.03 | 0.30                     | 0.27 | 0.30 | 1.57   | 1.57 | 1.57 |
|         | 20  | 7.13 | 7.12 | 7.13 | 0.56                     | 0.75 | 0.56 | 1.52   | 1.53 | 1.52 |
|         | 40  | 7.36 | 7.44 | 7.36 | 0.45                     | 0.78 | 0.45 | 1.34   | 1.38 | 1.34 |
|         | 60  | 7.43 | 7.42 | 7.43 | 0.56                     | 0.74 | 0.56 | 1.22   | 1.31 | 1.22 |
|         | 90  | 7.59 | 7.52 | 7.58 | 0.45                     | 0.65 | 0.45 | 1.23   | 1.31 | 1.23 |
| 50      | 0   | 7.02 | 7.04 | 7.04 | 0.24                     | 0.23 | 0.26 | 1.53   | 1.53 | 1.58 |
|         | 20  | 6.85 | 6.97 | 6.8  | 0.81                     | 1.31 | 0.84 | 1.39   | 1.35 | 1.46 |
|         | 40  | 7.11 | 7.47 | 7.12 | 0.73                     | 0.85 | 0.84 | 1.28   | 1.06 | 1.10 |
|         | 60  | 7.45 | 7.44 | 7.44 | 0.73                     | 0.82 | 0.74 | 1.02   | 0.86 | 0.88 |
|         | 90  | 7.83 | 7.74 | 7.81 | 0.65                     | 0.63 | 0.63 | 0.68   | 0.53 | 0.66 |
| 75      | 0   | 7.04 | 7.04 | 7.03 | 0.23                     | 0.23 | 0.24 | 1.55   | 1.55 | 1.54 |
|         | 20  | 6.92 | 7.14 | 6.78 | 0.84                     | 1.52 | 0.84 | 0.83   | 0.76 | 0.87 |
|         | 40  | 7.49 | 7.48 | 7.27 | 1.64                     | 0.72 | 0.87 | 0.83   | 0.57 | 0.52 |
|         | 60  | 7.67 | 7.5  | 7.65 | 1.32                     | 0.84 | 0.75 | 0.53   | 0.53 | 0.54 |
|         | 90  | 7.87 | 7.74 | 7.81 | 0.67                     | 0.74 | 0.64 | 0.34   | 0.33 | 0.55 |
| 100     | 0   | 7.03 | 7.03 | 7.03 | 0.22                     | 0.24 | 0.25 | 1.53   | 1.55 | 1.54 |
|         | 20  | 7.22 | 7.29 | 7.03 | 1.30                     | 1.31 | 0.46 | 0.86   | 0.73 | 0.75 |
|         | 40  | 7.56 | 7.34 | 7.29 | 1.47                     | 0.95 | 0.57 | 0.77   | 0.55 | 0.58 |
|         | 60  | 7.68 | 7.67 | 7.64 | 0.95                     | 0.73 | 0.75 | 0.56   | 0.44 | 0.52 |
|         | 90  | 7.86 | 7.75 | 7.84 | 0.53                     | 0.75 | 0.55 | 0.34   | 0.36 | 0.46 |

**Supplementary Table 2.** Effect of application of different concentrations of nano-chitosan-urea composite and conventional urea fertilizer on the percent nitrogen content in plant root, shoot and tuber tissues.

| Conc. | Shoot       |             |             | Root        |             |             | Tuber       |             |            | MEAN        |
|-------|-------------|-------------|-------------|-------------|-------------|-------------|-------------|-------------|------------|-------------|
|       | CU          | NCUC        | CS          | CU          | NCUC        | CS          | CU          | NCUC        | CS         |             |
| 0     | 0.94±0.01d  | 0.93±0.00d  | 0.93±0.00d  | 0.58±0.01d  | 0.61±0.02d  | 0.61±0.02d  | 1.37±0.01d  | 1.35±0.01d  | 1.36±0.01d | <b>0.96</b> |
| 50    | 1.01±0.00c  | 1.76±0.01c  | 1.40±0.01c  | 0.81±0.04c  | 1.85±0.01c  | 1.34±0.02c  | 1.51±0.02c  | 2.22±0.01c  | 1.79±0.01c | <b>1.52</b> |
| 75    | 1.23±0.03b  | 1.80±0.00b  | 1.43±0.01b  | 0.99±0.03b  | 2.23±0.02b  | 1.42±0.01b  | 1.67±0.01b  | 2.44±0.02b  | 1.95±0.01b | <b>1.68</b> |
| 100   | 1.46±0.03a  | 1.88±0.02a  | 1.54±0.00a  | 1.60±0.00a  | 2.48±0.01a  | 1.65±0.02a  | 1.82±0.02a  | 2.77±0.04a  | 2.11±0.03a | <b>1.92</b> |
| Mean  | <b>1.16</b> | <b>1.59</b> | <b>1.32</b> | <b>0.99</b> | <b>1.79</b> | <b>1.25</b> | <b>1.59</b> | <b>2.19</b> | <b>1.8</b> |             |

Means within the sub-factor followed by a different letter in a column are significantly different at  $p \leq 0.05$  according to a pair-wise comparison of least square means

**Supplementary Table 3.** Analysis of variance of N-fertilizer source and dose of application (N-level) on vegetative and yield attributes of potato cv. Kufri Pukhraj.

| Variables       | DF | Fresh shoot wt. (g) | Dry shoot wt. (g) | No. of sprouts | Avg. wt. tuber per plant (g) | Tuber wt. per plant (g) | No. of tubers non-marketable | No. of tubers marketable |
|-----------------|----|---------------------|-------------------|----------------|------------------------------|-------------------------|------------------------------|--------------------------|
| Source          | 2  | 102.37***           | 117.61***         | 0.58ns         | 6.07ns                       | 3229.86*                | 5.02**                       | 5.44**                   |
| N-level         | 3  | 229.70***           | 226.81***         | 4.33***        | 42.56**                      | 25650.00***             | 4.55**                       | 13.40***                 |
| Source* N-level | 6  | 14.56***            | 15.54***          | 0.36ns         | 19.63*                       | 590.97ns                | 10.87***                     | 2.29*                    |

\*  $p \leq 0.05$ , \*\* =  $p \leq 0.01$ , and \*\*\* =  $p \leq 0.001$

**Supplementary Table 4.** Effect of application of different concentrations of nano-chitosan-urea composite and conventional urea fertilizer on the yield attributes of potato

| Conc (%) | Average weight of tubers per pot (g) |             |             | Total weight of tubers per pot (g) |               |               | Mean   |
|----------|--------------------------------------|-------------|-------------|------------------------------------|---------------|---------------|--------|
|          | CU                                   | NCUC        | CS          | CU                                 | NCUC          | CS            |        |
| 0        | 19.03±0.97d                          | 21.06±0.85d | 20.23±1.52c | 216.67±22.07d                      | 225.00±14.45c | 216.67±22.07d | 119.7  |
| 50       | 23.08±1.11a                          | 22.14±1.07c | 16.33±0.46d | 300.00±14.45b                      | 316.67±8.34b  | 266.67±8.34c  | 157.5  |
| 75       | 22.14±0.60c                          | 25.60±1.14a | 23.73±1.51b | 325.00±14.45a                      | 375.00±14.45a | 348.33±25.90a | 186.63 |
| 100      | 22.96±0.28b                          | 23.21±1.03b | 26.67±1.67a | 283.33±10.94c                      | 316.67±8.34b  | 283.33±8.34b  | 159.36 |
| Mean     | 21.8                                 | 23.01       | 21.74       | 281.25                             | 315.83        | 278.75        |        |

|             | No. of non-marketable (<35 g) tubers |             |             | No. of marketable (>35 g) tubers |            |            |      |
|-------------|--------------------------------------|-------------|-------------|----------------------------------|------------|------------|------|
| <b>0</b>    | 9.00±0.58b                           | 8.33±0.33c  | 9.67±0.33c  | 2.33±0.33c                       | 2.33±0.33d | 1.67±0.88d | 5.55 |
| <b>50</b>   | 8.67±0.33c                           | 8.67±0.33b  | 13.00±0.58a | 4.33±0.33a                       | 5.67±0.33b | 3.33±0.33c | 7.27 |
| <b>75</b>   | 10.33±0.33a                          | 8.00±0.00d  | 11.00±0.58b | 4.33±0.33a                       | 6.67±0.33a | 3.67±0.33b | 7.33 |
| <b>100</b>  | 8.67±0.33c                           | 10.33±0.33a | 6.67±0.33d  | 3.67±0.33b                       | 3.33±0.33c | 4.00±0.00a | 6.11 |
| <b>Mean</b> | 9.16                                 | 8.83        | 10.08       | 3.66                             | 4.50       | 3.16       |      |

Means within the sub-factor followed by a different letter in a column are significantly different at  $p \leq 0.05$  according to a pair-wise comparison of least square means
